# Supplementary material for: Assessment of Aqueous Extraction Methods on Extractable Organic Matter and Hydrophobic/Hydrophilic Fractions of Virgin Forest Soils
Source: MDPI journal article supplement (doi:10.3390/molecules26092480), 2021-04-23
Supplement: s1 [file s1]

# Assessment of Aqueous Extraction Methods on Extractable Organic Matter and Hydrophobic/Hydrophilic Fractions of Virgin Forest Soils

Wan Muhammad Ikram Wan Mohd Zamri <sup>1</sup>, Fridelina Sjahrir <sup>1</sup>, Nor Suhaila Yaacob <sup>2,3,\*</sup>, Noor Fazreen Dzulkafli <sup>1</sup>, Mohd Fadzli Ahmad <sup>1</sup>, Hasdianty Abdullah <sup>1,3</sup>, Maegala Nallapan Maniyam <sup>2,3</sup>, Emi Fazlina Hashim <sup>1</sup>, Nobuyuki Kawasaki <sup>4</sup>, Kazuhiro Komatsu <sup>5</sup> and Victor S. Kuwahara <sup>6</sup>

<sup>1</sup> Department of Science & Biotechnology, Faculty of Engineering & Life Sciences, Universiti Selangor, 45600 Bestari Jaya, Selangor, Malaysia; ikramzamri1995@gmail.com (W.M.I.W.M.Z.); fridelina@unisel.edu.my (F.S.); fazreen@unisel.edu.my (N.F.D.); fadzli@unisel.edu.my (M.F.A.); dianty@unisel.edu.my (H.A.); hashim.emifazlina@nies.go.jp (E.F.H.)

<sup>2</sup> Institute of Bio-IT Selangor, Universiti Selangor, Jalan Zirkon A7/A, Seksyen 7, 40000 Shah Alam, Selangor, Malaysia; maegala@unisel.edu.my

<sup>3</sup> Centre for Foundation and General Studies, Universiti Selangor, Jalan Zirkon A7/A, Seksyen 7, 40000 Shah Alam, Selangor, Malaysia

<sup>4</sup> Dainippon Ink and Chemicals DIC Corporation, Central Research Laboratories, 631 Sakado, Chiba 285-8668, Sakura, Japan; nobuyuki-kawasaki@ma.dic.co.jp

<sup>5</sup> National Institute for Environmental Studies, 16-2 Onogawa, Ibaraki 305-8506, Tsukuba, Japan; kkomatsu@nies.go.jp

<sup>6</sup> Faculty of Education & Graduate School of Engineering, Soka University, 1-236 Tangi-Machi, Hachioji-Shi 192-8577 Tokyo, Japan; victor@soka.ac.jp

\* Correspondence: shuhaila@unisel.edu.my; Tel.: +60-355-223-428

## Supplementary Figure S1

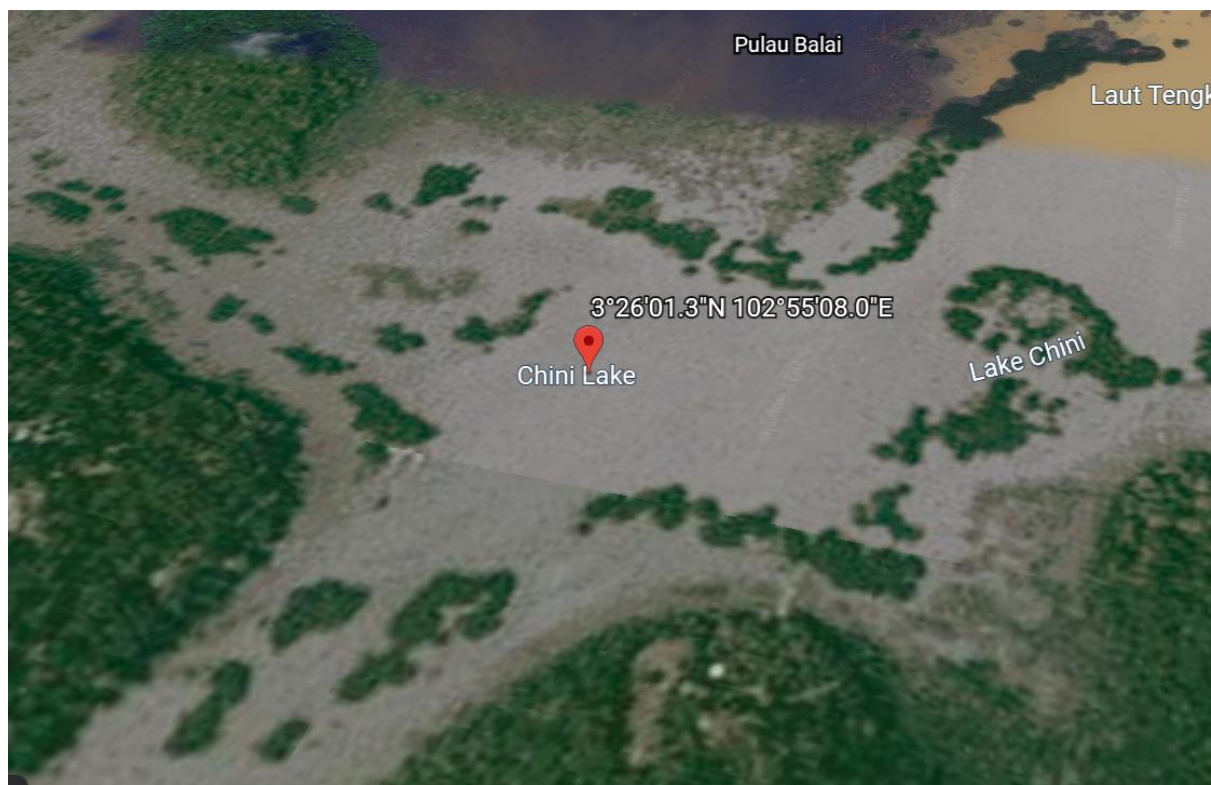

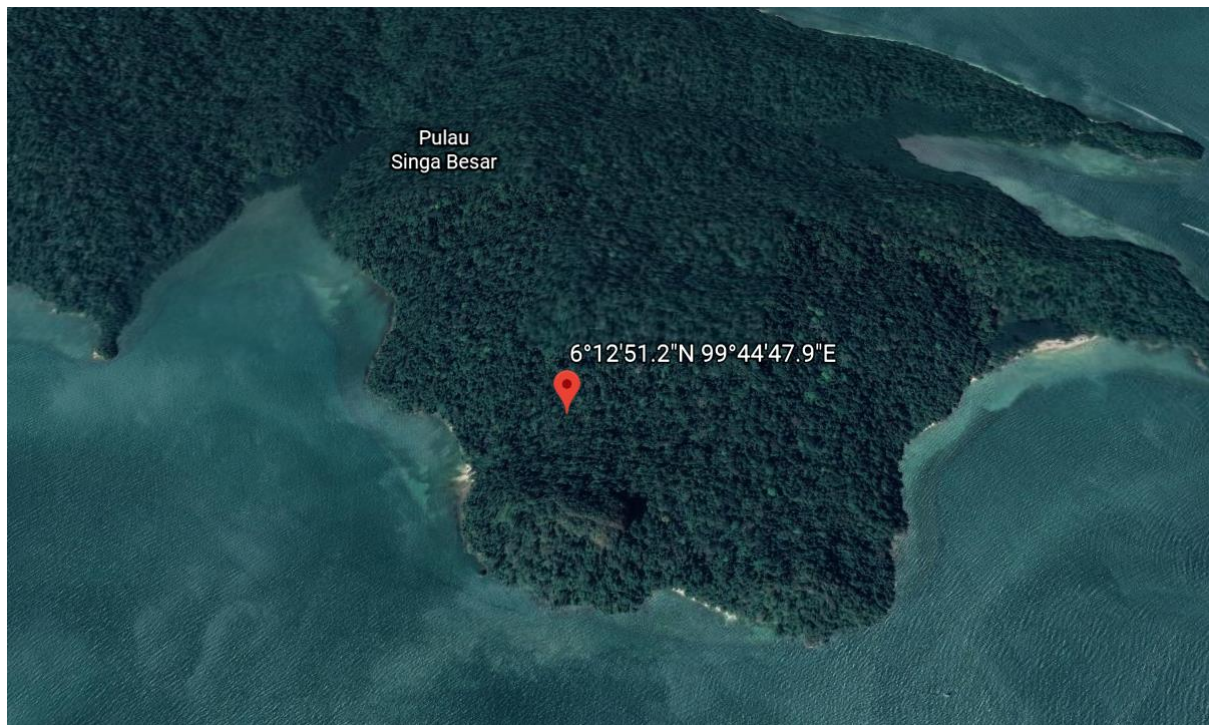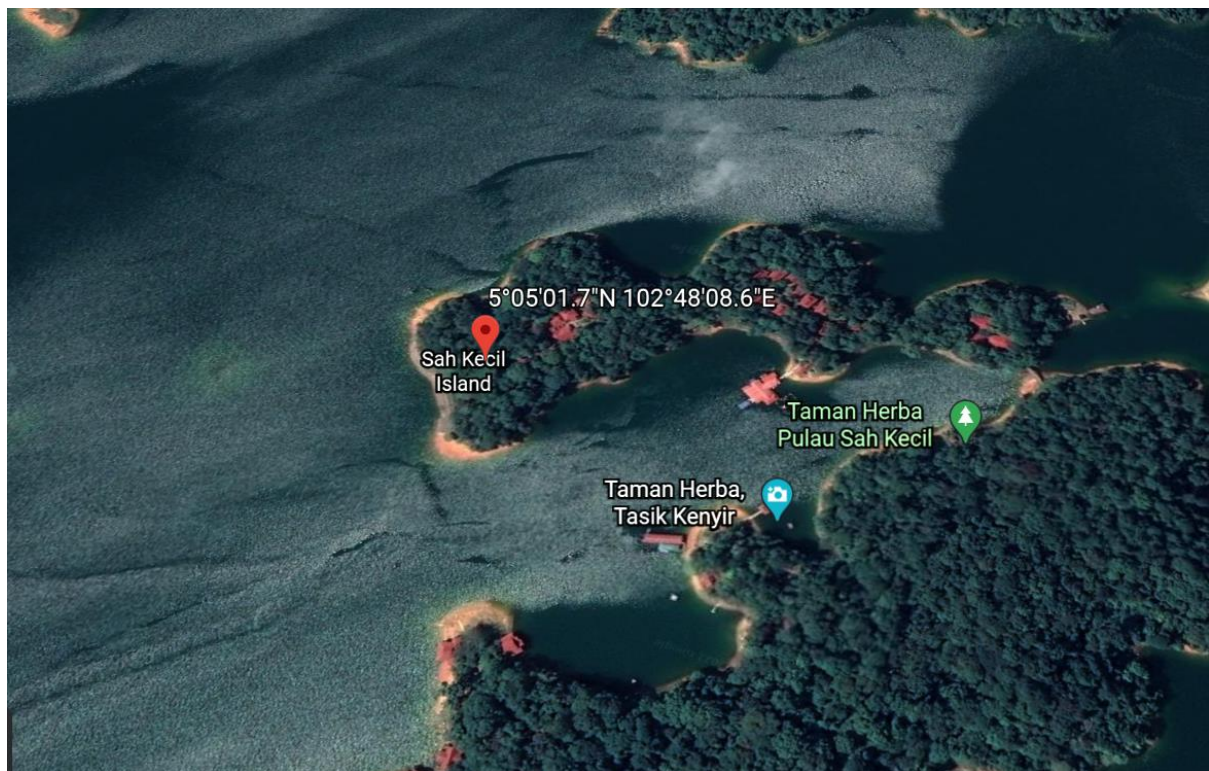

**Figure S1:** Map of sampling sites in this study A) Sg. Beruang near Chini Lake, Pahang (3°26'01.3"N 102°55'08.0"E) B) Singa Besar Island, Langkawi Island, Kedah (6°12'51.2"N 99°44'47.9"E) and C) Sah Kecil Island, Kenyir Lake ((5°05'01.7"N 102°48'08.6"E).
